# Supplementary material for: Seed free synthesis of polyethylene glycol stabilized gold nanoprisms exploiting manganese metal at low pH
Source: Royal Society of Chemistry journal article supplement (doi:10.1039/d3na00292f), 2023-01-01
Supplement: d3na00292f1.pdf [file d3na00292f1.pdf]

## Seed free synthesis of polyethylene glycol stabilized gold nanoprism exploiting manganese metal at low pH

Kanika Bharti,<sup>a</sup> Md Azimuddin Sk<sup>a</sup> and Kalyan K. Sadhu\*<sup>a</sup>

Department of Chemistry, Indian Institution of Technology Roorkee, Roorkee 247667, Uttarakhand, India

### Correspondence:

Kalyan K. Sadhu  
[sadhu@cy.iitr.ac.in](mailto:sadhu@cy.iitr.ac.in)

### Table of Contents

|     |                                  |    |
|-----|----------------------------------|----|
| 1.  | Figure S1-S3.....                | 2  |
| 2.  | Figure S4-S6.....                | 3  |
| 3.  | Figure S7-S9.....                | 4  |
| 4.  | Figure S10-S12.....              | 5  |
| 5.  | Figure S13-S14.....              | 6  |
| 6.  | Figure S15-S16 and Table S1..... | 7  |
| 7.  | Figure S17-S19.....              | 8  |
| 8.  | Figure S20-S21 and Table S2..... | 9  |
| 9.  | Figure S22-S24.....              | 10 |
| 10. | Figure S25-S27.....              | 11 |
| 11. | Figure S28-S29 and Table S3..... | 12 |
| 12. | Figure S30-S31.....              | 13 |
| 13. | Figure S32.....                  | 14 |
| 14. | Figure S33-S34 and Table S4..... | 15 |
| 15. | Figure S35-S37.....              | 16 |
| 16. | Figure S38-S40.....              | 17 |

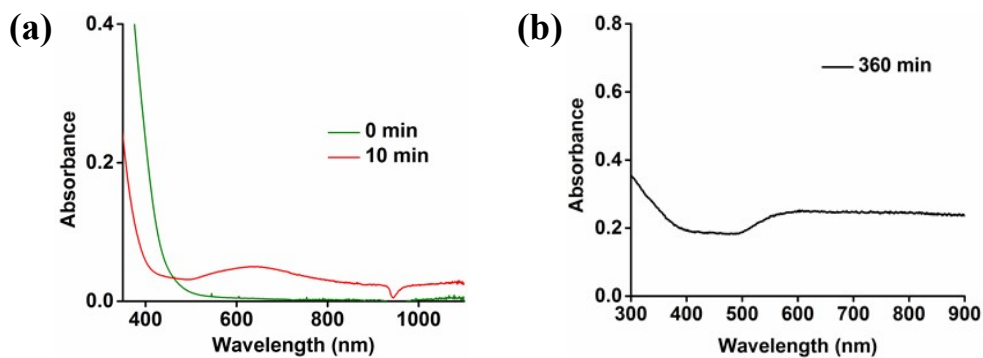

**Figure S1:** Time dependent absorbance spectra obtained using Au:PEG as 1:0.5 (a) 0- 10 min (b) after 360 min.

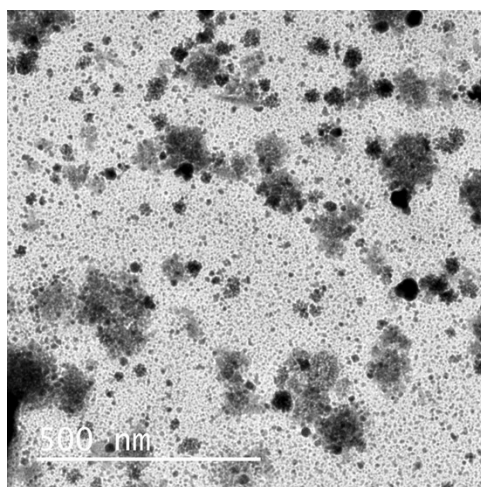

**Figure S2:** TEM image for reaction performed using Au:PEG as 1:0.5 after 10 min. The dark spots are due to gold nanoparticle and the lighter shade throughout the grid is due to excess PEG.

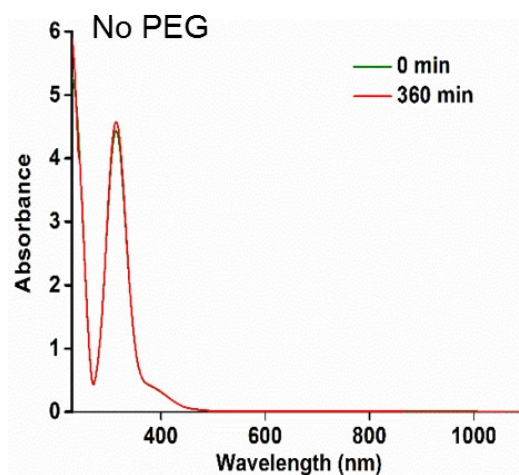

**Figure S3:** Time dependent absorbance spectra obtained using Au:Mn:HCl as 1:2:26.

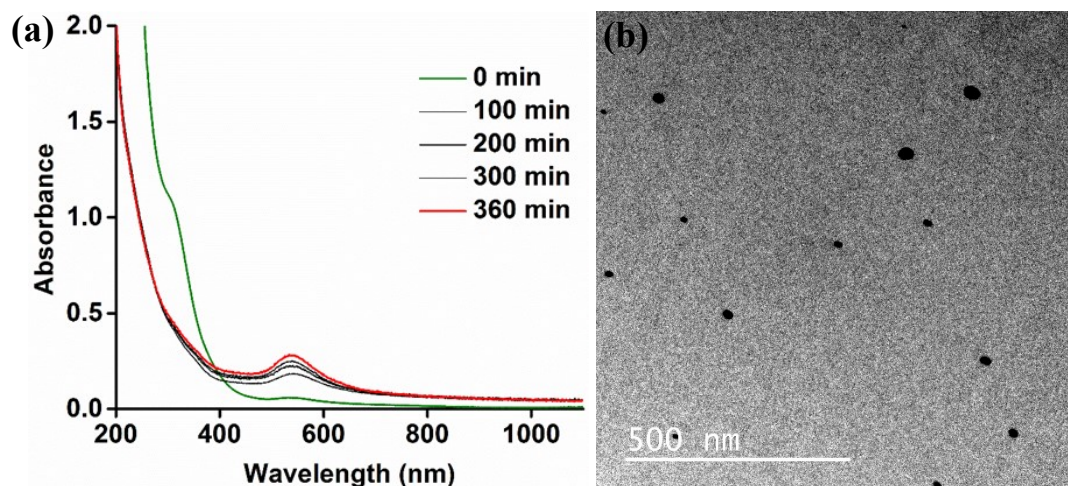

**Figure S4:** (a) Time dependent absorbance spectra obtained using Au:PEG:Mn as 1:0.5:2 (b)TEM image for reaction performed using Au:PEG:Mn as 1:0.5:2.

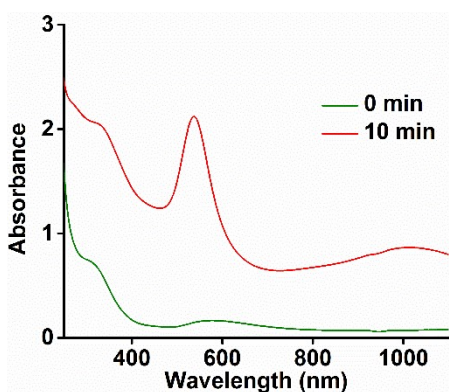

**Figure S5:** Time dependent absorbance spectra obtained using of Au:PEG:Mn:HCl as 1:0.5:2:10.

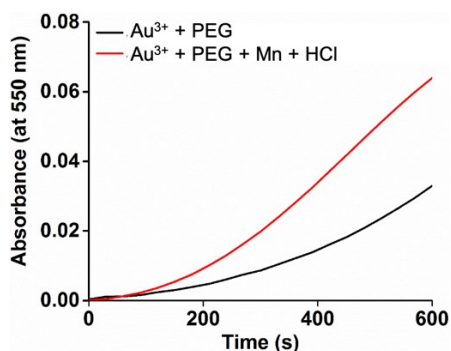

**Figure S6:** Time dependent absorption at 550 nm after the reduction of Au<sup>3+</sup> (a) by PEG only and (b) by all three-reagent combination.

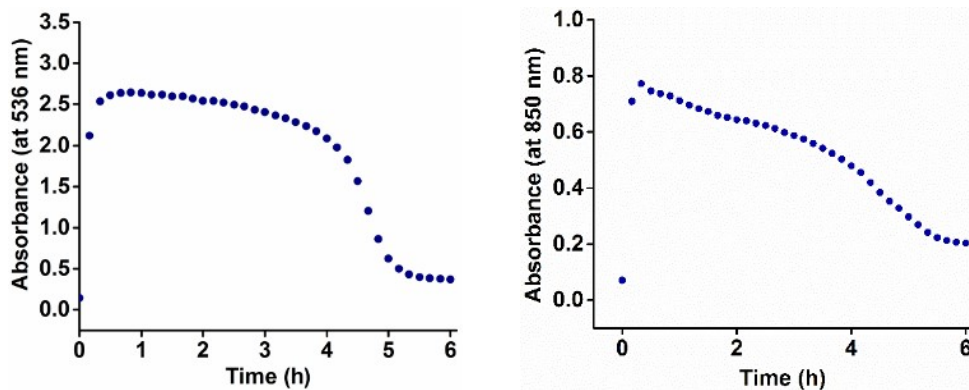

**Figure S7:** Time dependent absorbance plot at 536 and 850 nm obtained for reaction performed for 6 h using Au:PEG:Mn:HCl as 1:0.5:2:10

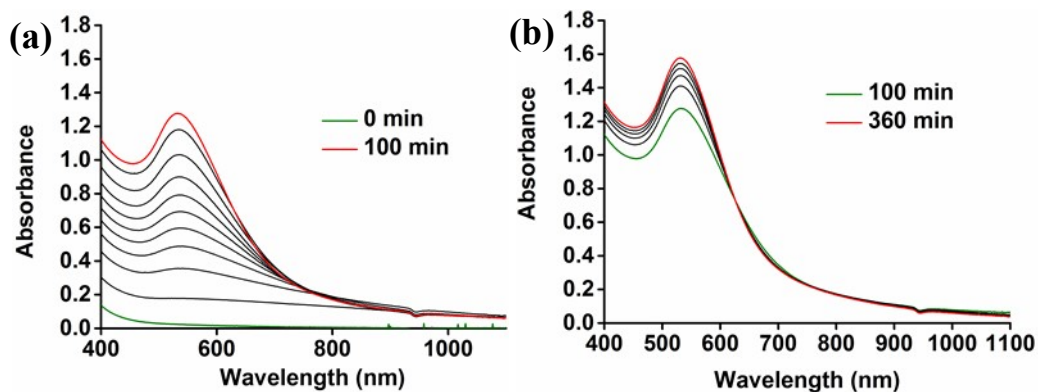

**Figure S8:** Time dependent absorbance spectra obtained using Au:PEG:Mn as 1:0.5:2 in 26 equivalent NaOH.

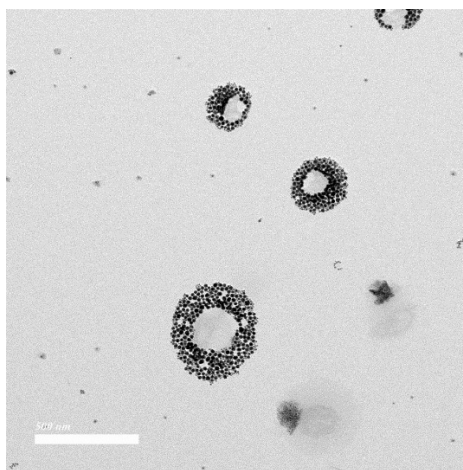

**Figure S9:** TEM image obtained using Au:PEG:Mn as 1:0.5:2 in 26 equivalent NaOH.

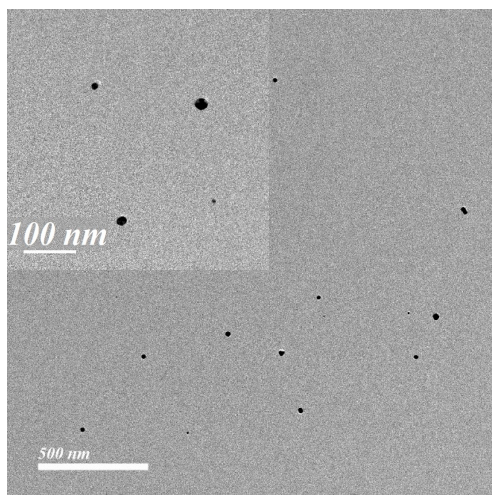

**Figure S10:** TEM image taken after 6 h of the reaction using Au:PEG:Mn:HCl as 1:0.5:2:10.

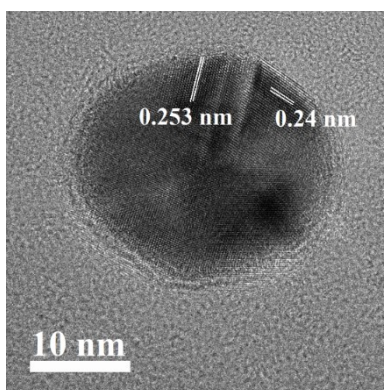

**Figure S11:** HRTEM image showing parallel twinning boundaries using Au:PEG:Mn:HCl as 1:0.5:2:10 for 6 h.

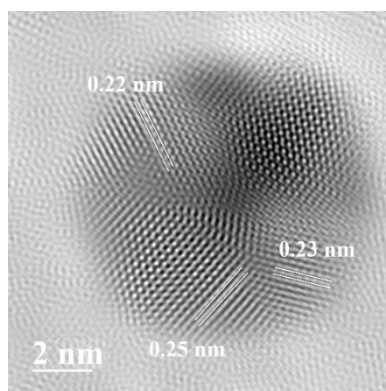

**Figure S12:** HRTEM image showing multiple packing defects using Au:PEG:Mn:HCl as 1:0.5:2:10 for 6 h.

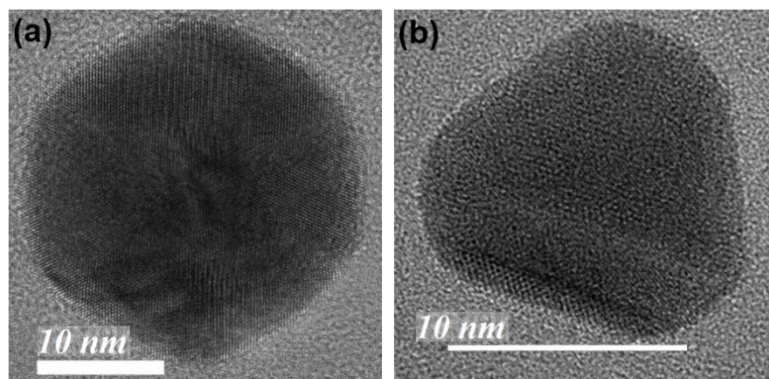

**Figure S13:** HRTEM images of gold nanostructures with (a) pentatwinned nanostructures and (b) nanoprism obtained from the reaction between Au:PEG:Mn:HCl as 1:0.5:2:20 for 6 h.

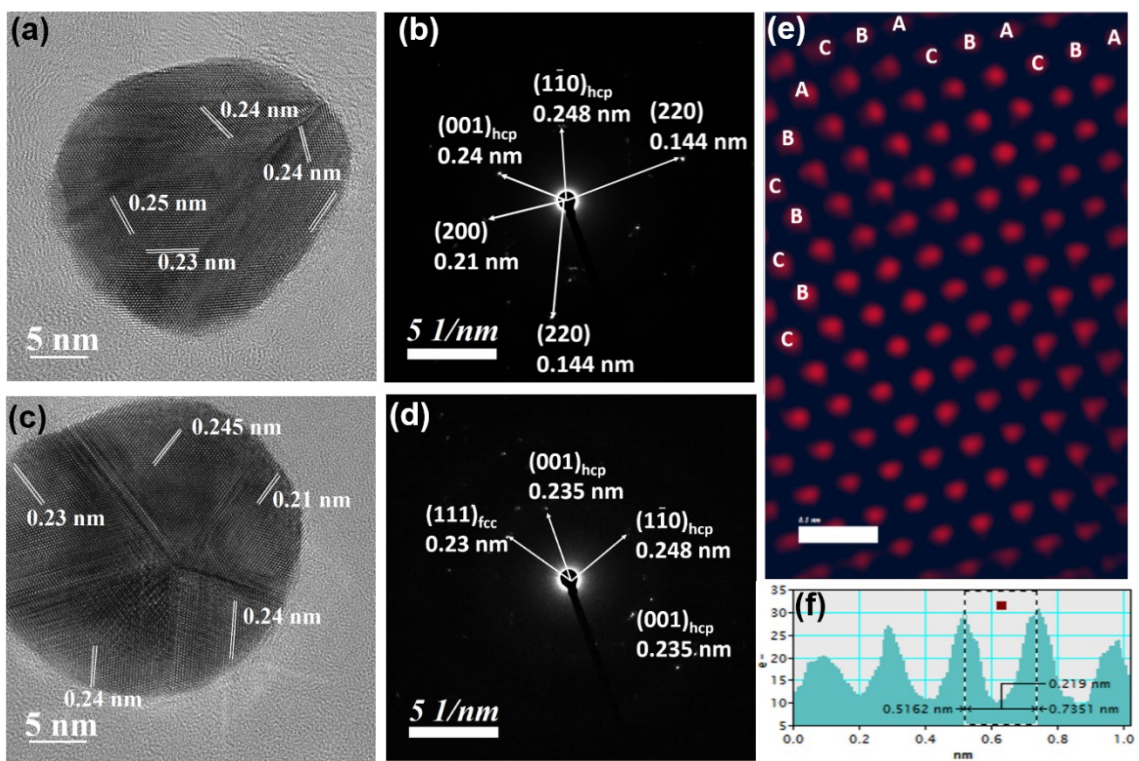

**Figure S14:** HRTEM images of gold nanostructures with (a) truncated nanoprism, (b) SAED analysis of truncated nanoprism, (c) pentatwinned nanostructures (d) SAED analysis of pentatwinned nanostructures, (e) HAADF image showing ABC-ABC (*fcc*) type and BC-BC-BC (*hcp* (2H)) type packing and (f) distance of fringe lines in truncated nanoprism using Au:PEG:Mn:HCl as 1:0.5:2:24 for 6 h.

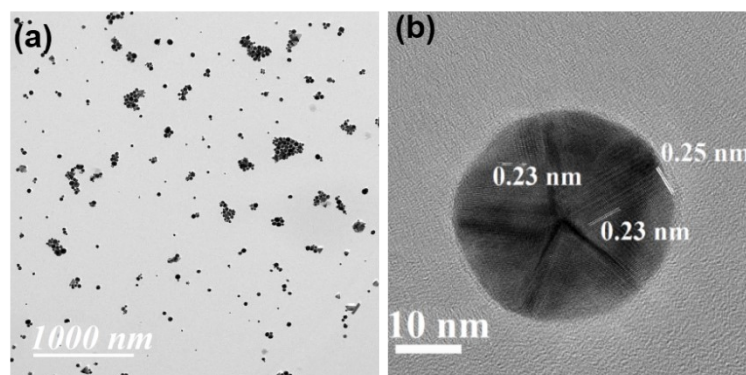

**Figure S15:** HRTEM images of (a) gold nanostructures with mostly (b) pentatwinned nanostructures using Au:PEG:Mn:HCl as 1:0.5:2:32 for 6 h.

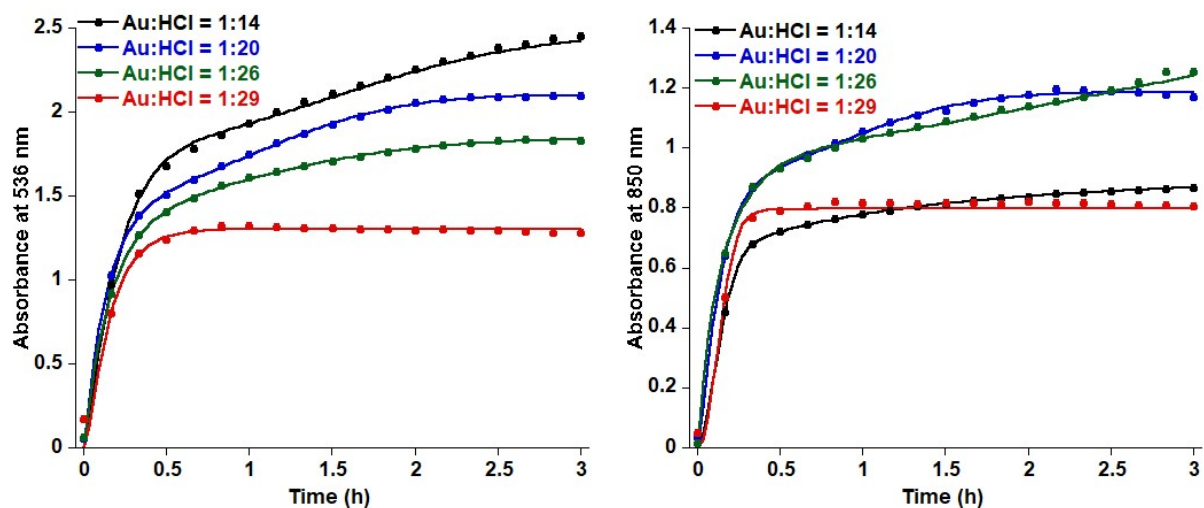

**Figure S16:** Fitting of time dependent data at 536 nm and 850 nm in presence of HCl variation using equation (1).

**Table S1.** Calculated rate constants ( $k_1$  and  $k_2$ ) and Avrami constants ( $n_1$  and  $n_2$ ) from Absorbance data in Fig. S16

| Equiv. of HCl | 536 nm                           |       |                           |       | 850 nm                                |       |                           |       |
|---------------|----------------------------------|-------|---------------------------|-------|---------------------------------------|-------|---------------------------|-------|
|               | Spherical nanoparticle formation |       | Nanoprism formation       |       | Aggregation of Spherical nanoparticle |       | Nanoprism formation       |       |
|               | $k_1$ ( $\text{h}^{-2}$ )        | $n_1$ | $k_2$ ( $\text{h}^{-1}$ ) | $n_2$ | $k_1$ ( $\text{h}^{-2}$ )             | $n_1$ | $k_2$ ( $\text{h}^{-1}$ ) | $n_2$ |
| 14            | 0.22                             | 2.28  | 5.99                      | 1.15  | 29.50                                 | 1.85  | 0.91                      | 0.75  |
| 20            | 0.49                             | 2.27  | 6.54                      | 0.98  | 0.75                                  | 2.10  | 10.54                     | 1.20  |
| 26            | 0.54                             | 1.81  | 5.56                      | 0.95  | 0.08                                  | 1.58  | 4.99                      | 0.85  |
| 29            | 45.15                            | 1.88  | 7.11                      | 1.17  | 37.00                                 | 2.00  | 1.35                      | 1.00  |

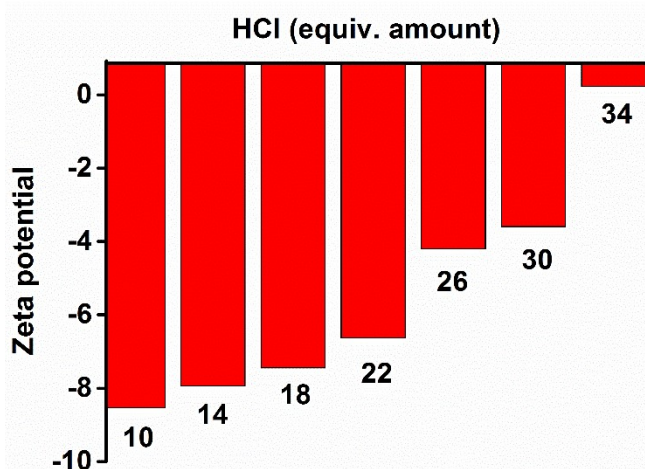

**Figure S17:** Variation in  $\zeta$  potential of the synthesized particles while changing HCl amount from 10 equivalent to 32 equivalent.

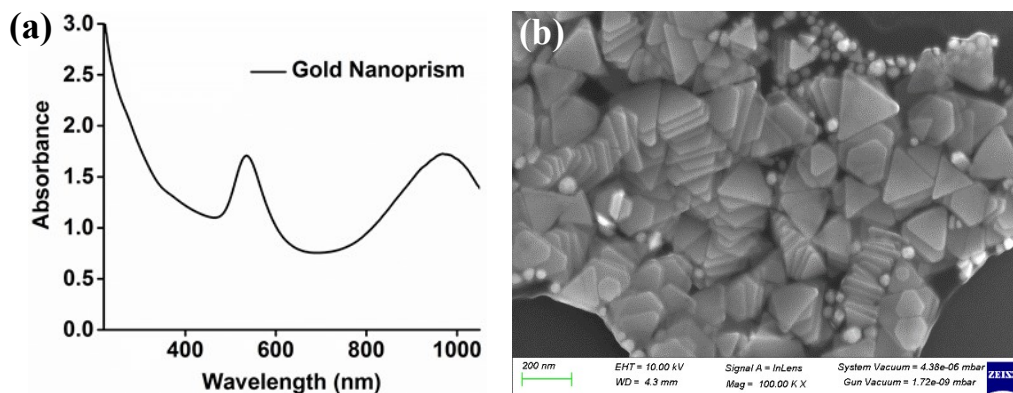

**Figure S18:** (a) Absorbance spectrum and (b) FESEM image of the gold nanoprism synthesis (Au:PEG:Mn:HCl as 1:0.5:2:26 for 30 min) on large scale after purification by centrifugation.

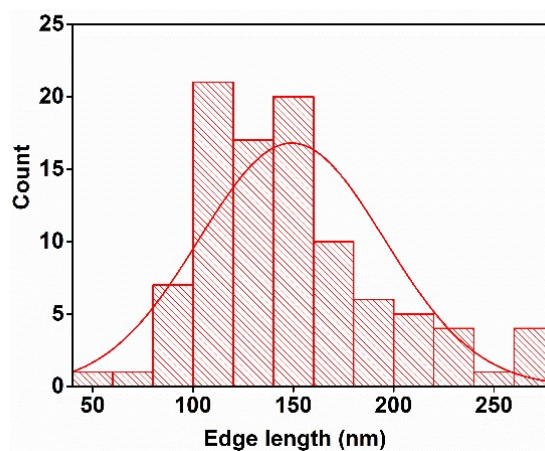

**Figure S19:** Histogram of nanoprisms after purification by centrifugation.



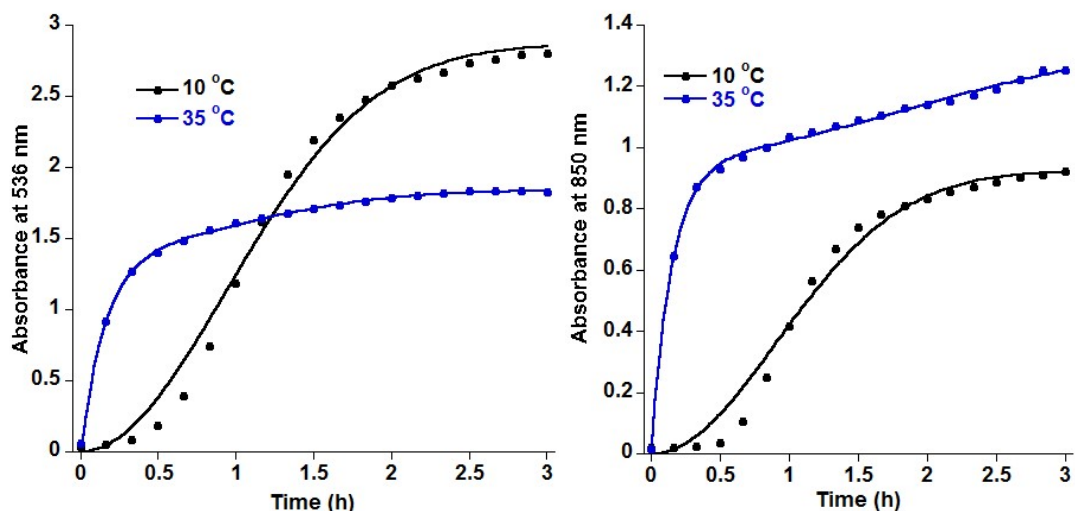

**Figure S20:** Fitting of time dependent data at 536 nm and 850 nm at different temperature using equation (2).

**Table S2.** Calculated rate constants ( $k_1$  and  $k_2$ ) and Avrami constants ( $n_1$  and  $n_2$ ) from Absorbance data in **Fig. S20**.

| Temperature<br>(°C) | 536 nm                                 |                          | 850 nm                                                   |                          |
|---------------------|----------------------------------------|--------------------------|----------------------------------------------------------|--------------------------|
|                     | Spherical<br>nanoparticle<br>formation | Nanoprism<br>formation   | Aggregation of<br>spherical<br>nanoparticle<br>formation | Nanoprism<br>formation   |
|                     | $k_1$ (h <sup>-2</sup> )               | $k_2$ (h <sup>-1</sup> ) | $k_1$ (h <sup>-2</sup> )                                 | $k_2$ (h <sup>-1</sup> ) |
| 10                  | 0.57                                   | 0.0023                   | 0.61                                                     | 0.59                     |
| 35                  | 0.51                                   | 5.59                     | 0.16                                                     | 6.51                     |

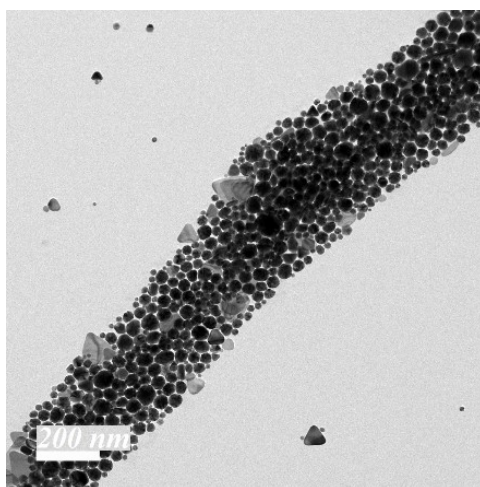

**Figure S21:** TEM image at 10 °C using 26 eq. HCl

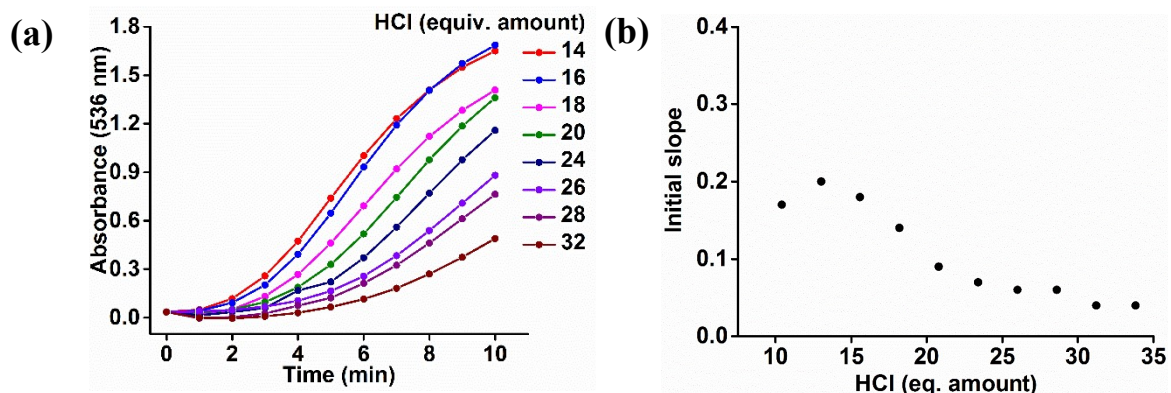

**Figure S22:** (a) Time dependent absorbance studies for 10 minutes and (b) change in the calculated initial slope with increasing HCl concentration.

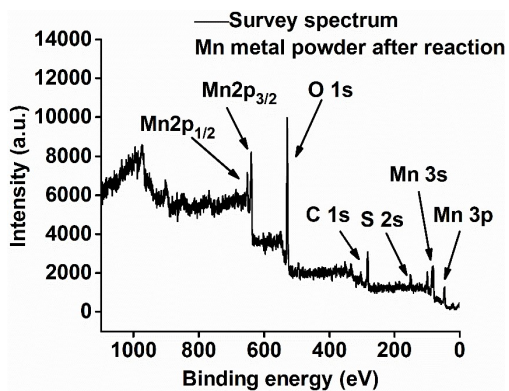

**Figure S23:** Survey scan of XPS confirms the presence of Mn and trace amount of PEG in the precipitate.

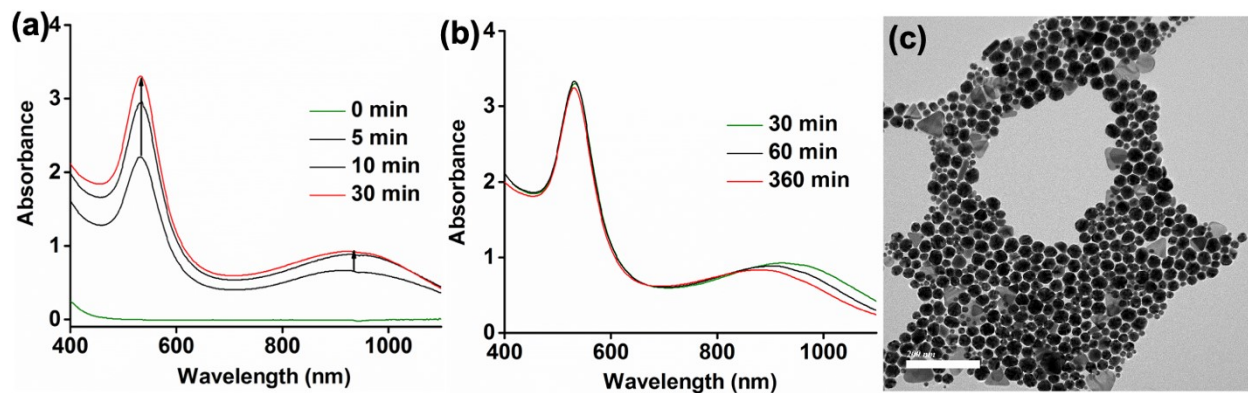

**Figure S24:** (a-b) Absorbance at different time intervals and (c) TEM image using 26 mM H<sub>2</sub>SO<sub>4</sub>.

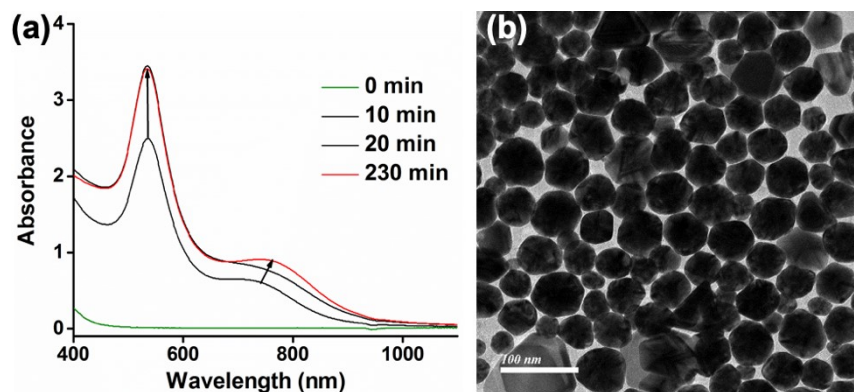

Figure S25: (a) Absorbance at different time intervals and (b) TEM image using 26 mM HNO<sub>3</sub>.

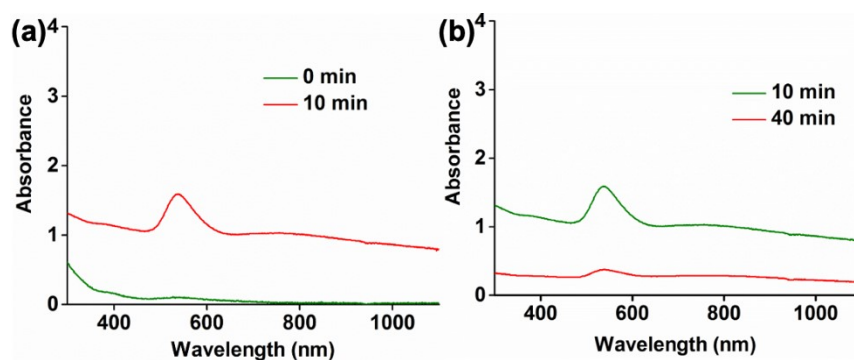

Figure S26: (a-b) Absorbance at different time intervals using 11 mM HBr.

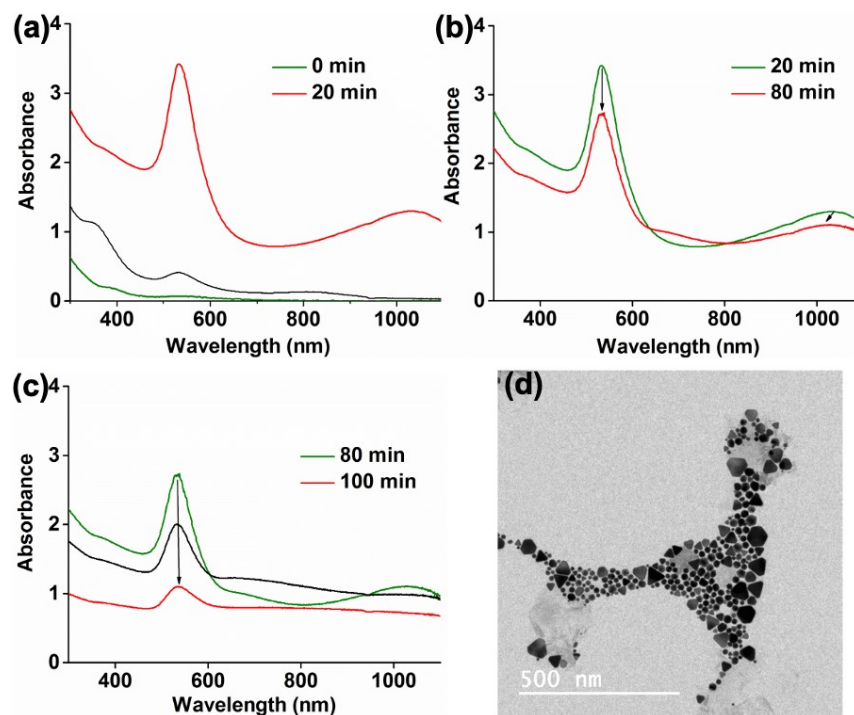

Figure S27: (a-c) Absorbance at different time intervals and (d) TEM imaging using 8 mM HBr.

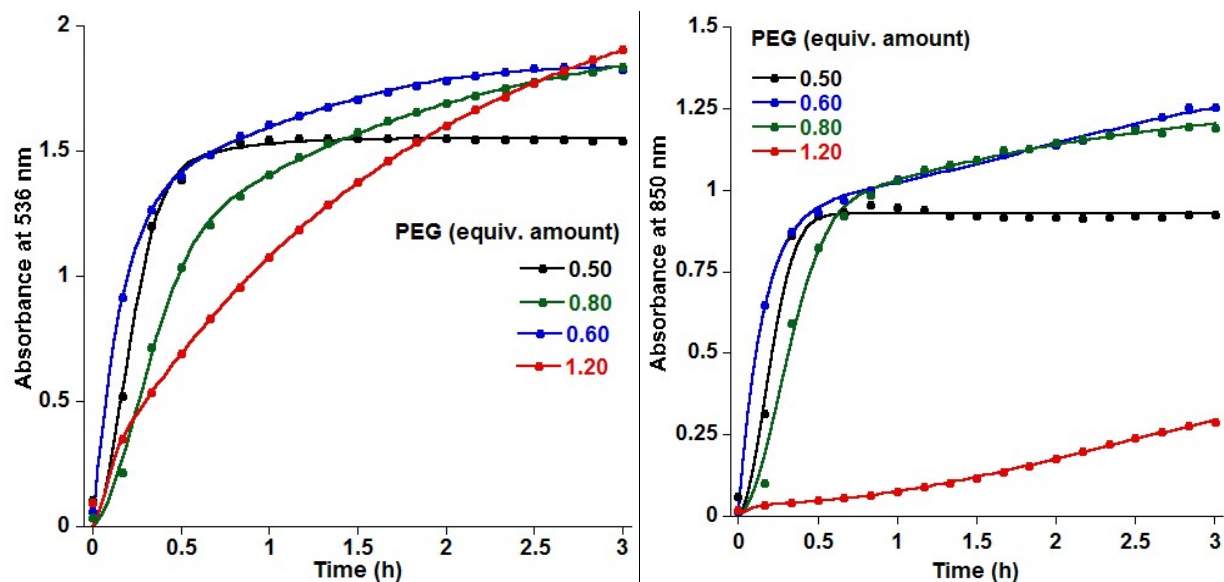

**Figure S28:** Fitting of time dependent data at 536 nm and 850 nm absorbance in presence of 0.5-1.2 equivalent PEG with respect to  $\text{Au}^{3+}$  amount using equation (2).

**Table S3.** Calculated rate constants ( $k_1$  and  $k_2$ ) from Absorbance data in **Fig. S28**.

| Equiv. of PEG | 536 nm                           |                           | 850 nm                                          |                           |
|---------------|----------------------------------|---------------------------|-------------------------------------------------|---------------------------|
|               | Spherical nanoparticle formation | Nanoprism formation       | Aggregation of spherical nanoparticle formation | Nanoprism formation       |
|               | $k_1$ ( $\text{h}^{-2}$ )        | $k_2$ ( $\text{h}^{-1}$ ) | $k_1$ ( $\text{h}^{-2}$ )                       | $k_2$ ( $\text{h}^{-1}$ ) |
| 0.50          | 14.72                            | 2.82                      | 16.65                                           | 8.15                      |
| 0.60          | 0.51                             | 5.59                      | 0.16                                            | 6.51                      |
| 0.80          | 6.97                             | 0.63                      | 7.28                                            | 0.51                      |
| 1.20          | 85.94                            | 0.54                      | 0.09                                            | 13.18                     |

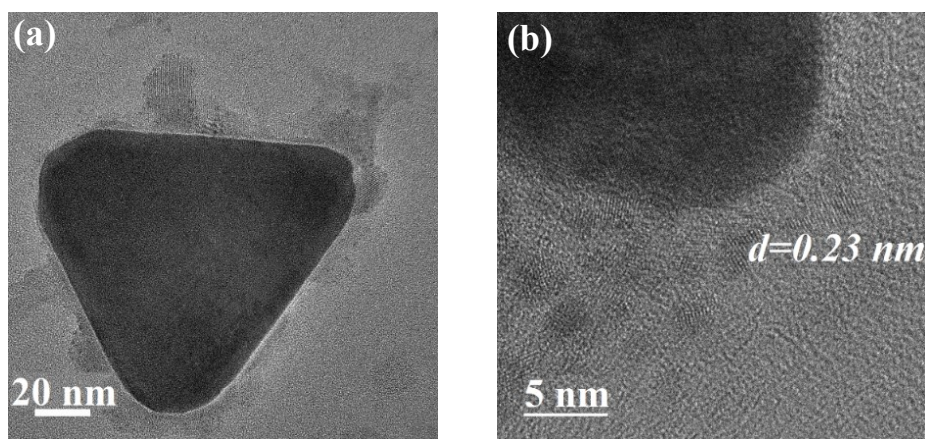

**Figure S29:** (a) TEM and (b) HRTEM images of gold nanoclusters observed on the surface of gold nanoprism using Au:PEG:Mn:HCl as 1:1.2:2:26 for 6 h.

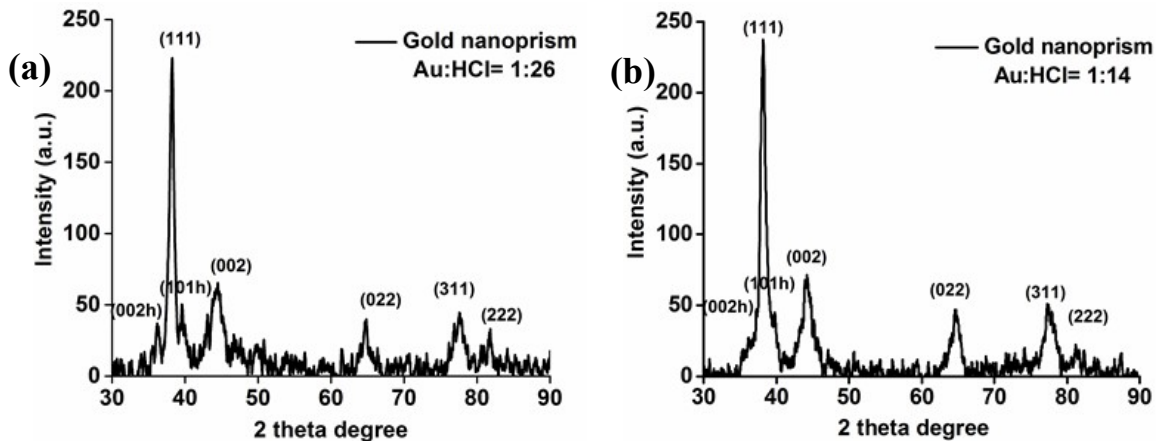

**Figure S30:** XRD pattern obtained with varying HCl concentration (a) Au:HCl= 1:26 (b) Au:HCl= 1:14.

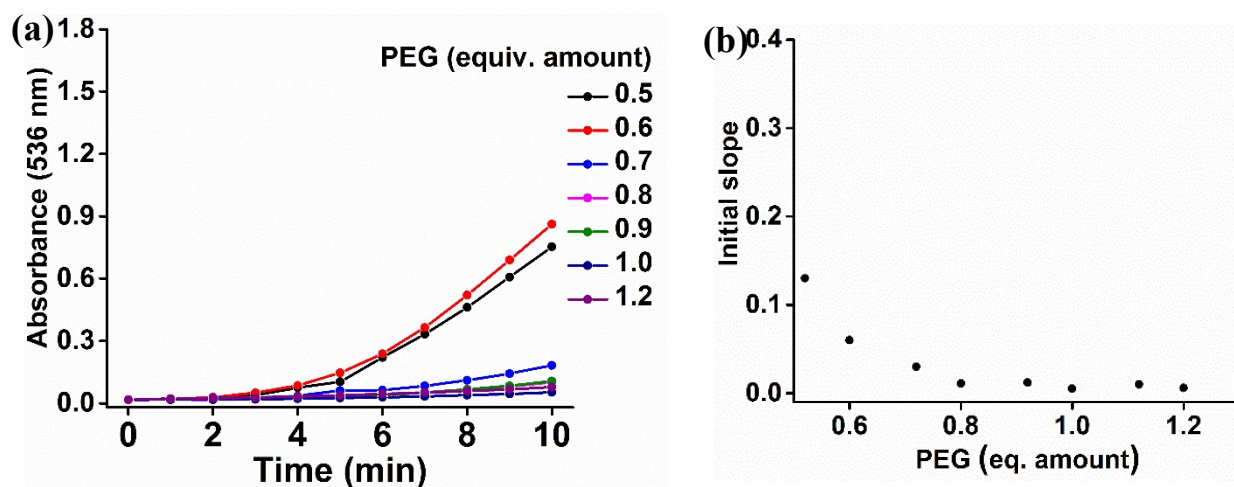

**Figure S31:** (a) Time dependent absorbance studies for 10 minutes and (b) changes in the calculated initial slope with increasing PEG amount.

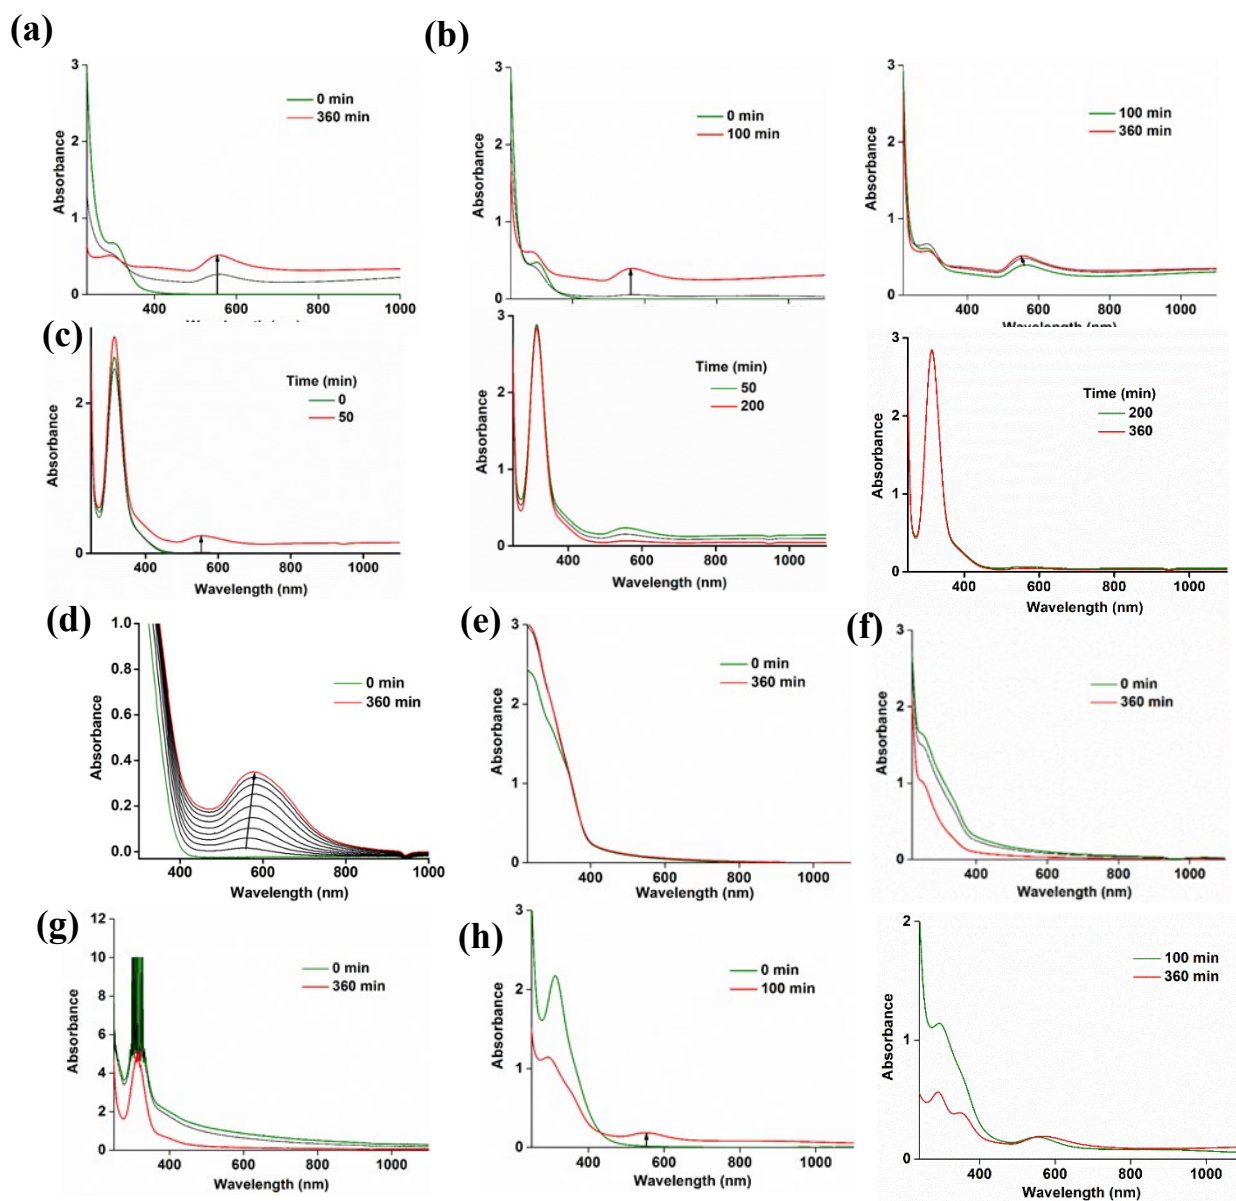

**Figure S32:** Absorbance spectra using (a) Reduced glutathione, (b) oxidized glutathione, (c) PEG-SH ( $M_n=6000$ ), (d) PEG-SH ( $M_n=800$ ), (e) 3-mercaptopropanoic acid, (f) 6-mercaptohexanoic acid, (g) polystyrene thiol terminated and (h) Lipoic acid.

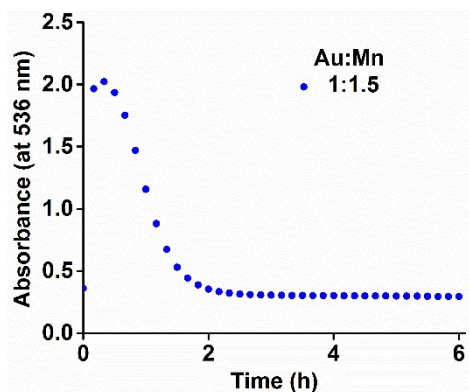

**Figure S33:** Time dependent absorbance at 536 nm using Au:PEG:Mn:HCl as 1:0.5:1.5:26 for 6 h.

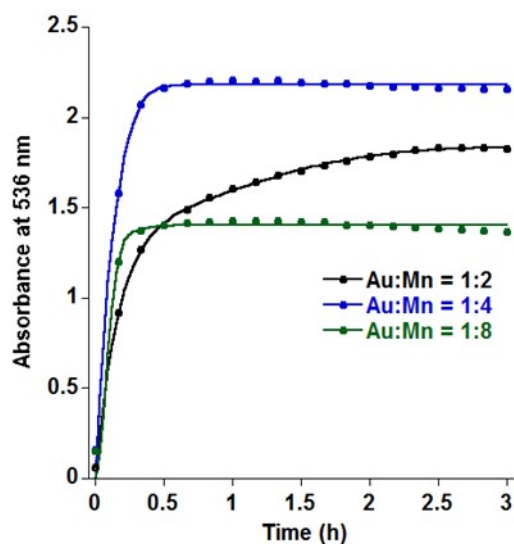

**Figure S34:** Fitting of time dependent data at 536 nm absorbance in presence of 2 to 8 equivalent of Mn with respect to  $\text{Au}^{3+}$  amount using equation (2).

**Table S4.** Calculated rate constants ( $k_1$  and  $k_2$ ) from Absorbance data in **Fig. S34**.

| Equiv.<br>of<br>Mn | 536 nm                                 |                           |
|--------------------|----------------------------------------|---------------------------|
|                    | Spherical<br>nanoparticle<br>formation | Nanoprism<br>formation    |
|                    | $k_1$ ( $\text{h}^{-2}$ )              | $k_2$ ( $\text{h}^{-1}$ ) |
| 2.0                | 0.51                                   | 5.95                      |
| 4.0                | 19.69                                  | 10.71                     |
| 8.0                | 81.09                                  | 7.73                      |

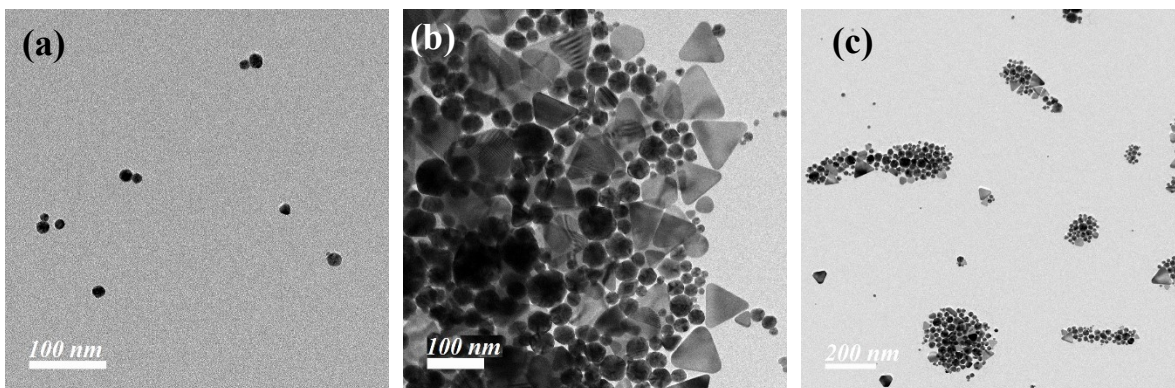

**Figure S35:** TEM images obtained by varying Au:Mn (a) 1:1.5 (b) 1:4 (c) 1:8.

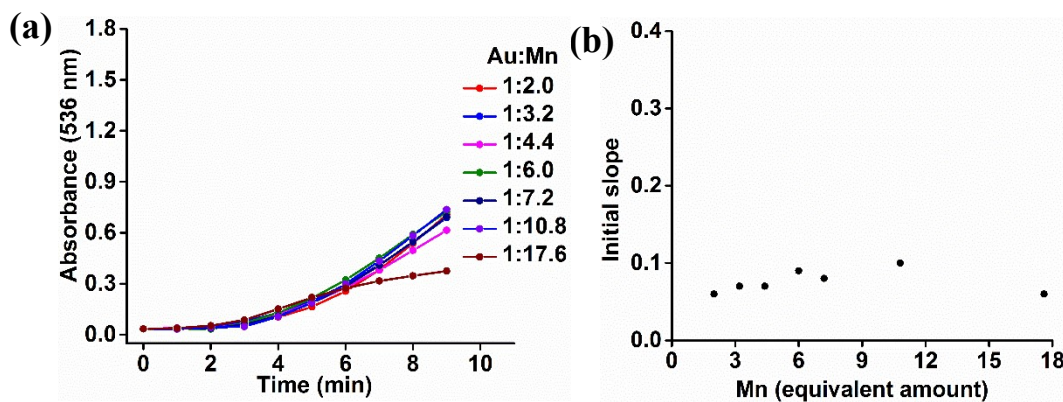

**Figure S36:** (a) Time dependent absorbance studies for 10 minutes and (b) changes in the calculated initial slope with increasing Mn amount.

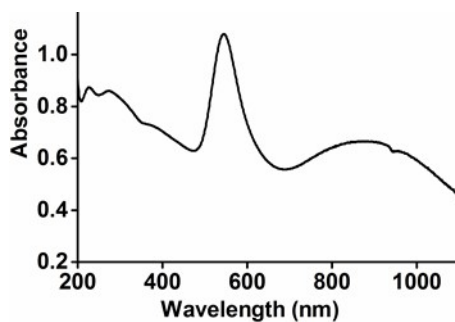

**Figure S37:** Absorbance spectrum of the nanoprism after growth in presence of amine modified single strand nucleic acid.



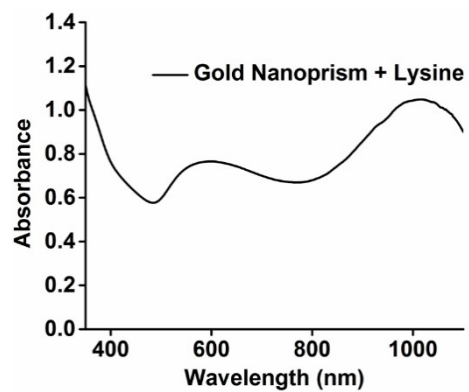

**Figure S38:** Absorbance spectrum of the nanoprism after growth in the presence of lysine.

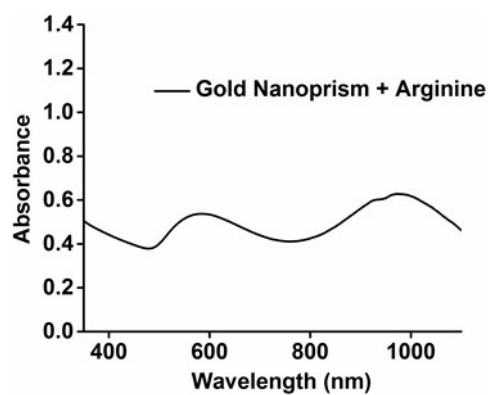

**Figure S39:** Absorbance spectrum of the nanoprism after growth in the presence of arginine.

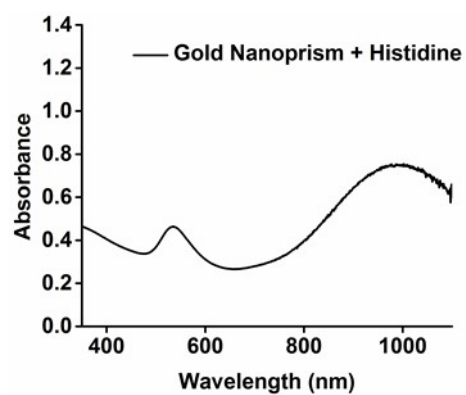

**Figure S40:** Absorbance spectrum of the nanoprism after growth in the presence of histidine.
